# Supplementary material
Source: ML conference proceedings conference paper supplement (https://proceedings.mlr.press/v28/raman13.html)
Supplement: Supplementary file 1 [file raman13-supp.pdf]

# Supplementary Material

## A. Proofs

Below are proofs for the regret bounds from Sections 5 and 6.

### A.1. Proof of Theorem 2

First, we bound  $\mathbf{E}[\|\mathbf{w}_{T+1}\|^2]$ :

$$\begin{aligned} \mathbf{E}[\mathbf{w}_{T+1}^\top \mathbf{w}_{T+1}] &= \mathbf{E}[\mathbf{w}_T^\top \mathbf{w}_T + 2\mathbf{w}_T^\top \phi(\mathbf{x}_T, \bar{\mathbf{y}}_T) \\ &\quad - 2\mathbf{w}_T^\top \phi(\mathbf{x}_T, \mathbf{y}_T) + \|\phi(\mathbf{x}_T, \bar{\mathbf{y}}_T) - \phi(\mathbf{x}_T, \mathbf{y}_T)\|^2] \\ &\leq \mathbf{w}_1^\top \mathbf{w}_1 + 2 \sum_{t=1}^T \mathbf{E}[\mathbf{w}_t^\top \phi(\mathbf{x}_t, \bar{\mathbf{y}}_t) - \mathbf{w}_t^\top \phi(\mathbf{x}_t, \mathbf{y}_t)] + 4R^2 T \\ &\leq (4R^2 + 2\Delta)T \end{aligned}$$

The first line utilizes the update rule from algorithm 2. The second line follows from  $\|\phi(\mathbf{x}, \mathbf{y})\| \leq R$  and repeating the inequality for  $t = T-1, \dots, 1$ . The last inequality uses the premise on affirmativeness.

Using the update rule again, we get:

$$\begin{aligned} \mathbf{E}[\mathbf{w}_{T+1}^\top \mathbf{w}_*] &= \mathbf{E}[\mathbf{w}_T^\top \mathbf{w}_* + (\phi(\mathbf{x}_T, \bar{\mathbf{y}}_T) - \phi(\mathbf{x}_T, \mathbf{y}_T))^\top \mathbf{w}_*] \\ &= \sum_{t=1}^T \mathbf{E}[(U(\mathbf{x}_t, \bar{\mathbf{y}}_t) - U(\mathbf{x}_t, \mathbf{y}_t))] \\ &\geq \alpha \sum_{t=1}^T (U(\mathbf{x}_t, \mathbf{y}_t^*) - \mathbf{E}[U(\mathbf{x}_t, \mathbf{y}_t)]) - \sum_{t=1}^T \xi_t \end{aligned}$$

where the last line uses Eq. (4). Using the Cauchy-Schwarz inequality and concavity of  $\sqrt{x}$ , we get  $\mathbf{E}[\mathbf{w}_{T+1}^\top \mathbf{w}_*] \leq \|\mathbf{w}_*\| \mathbf{E}[\|\mathbf{w}_{T+1}\|] \leq \|\mathbf{w}_*\| \sqrt{\mathbf{E}[\|\mathbf{w}_{T+1}\|^2]}$  from which the claimed result follows.

### A.2. Proof of Corollary 3

Note that:

$$\hat{\mathbf{y}}_t = \operatorname{argmax}_{\mathbf{y}} \mathbf{w}_t^\top \phi(\mathbf{x}_t, \mathbf{y})$$

Therefore:

$$\forall t, \bar{\mathbf{y}}_t : \mathbf{w}_t^\top \phi(\mathbf{x}_t, \bar{\mathbf{y}}_t) \leq \mathbf{w}_t^\top \phi(\mathbf{x}_t, \hat{\mathbf{y}}_t)$$

Hence:

$$\begin{aligned} \forall t : \mathbf{E}[\mathbf{w}_t^\top \phi(\mathbf{x}_t, \bar{\mathbf{y}}_t)] - \mathbf{E}[\mathbf{w}_t^\top \phi(\mathbf{x}_t, \mathbf{y}_t)] \\ \leq \mathbf{w}_t^\top \phi(\mathbf{x}_t, \hat{\mathbf{y}}_t) - \mathbf{E}[\mathbf{w}_t^\top \phi(\mathbf{x}_t, \mathbf{y}_t)] \end{aligned} \quad (10)$$

Given the condition of the corollary, and the above Equation 10, we get that:

$$\frac{1}{T} \sum_{t=1}^T \mathbf{E}[\mathbf{w}_t^\top \phi(\mathbf{x}_t, \bar{\mathbf{y}}_t)] - \mathbf{E}[\mathbf{w}_t^\top \phi(\mathbf{x}_t, \mathbf{y}_t)] \leq \Omega$$

which using Theorem 2 gives us the corresponding regret bound.

### A.3. Proof of Theorem 4

This proof is very similar to the one in (Raman et al., 2012), though it solves a different problem. In particular since:

$$\forall t : \mathbf{E}[\mathbf{w}_t^\top \phi(\mathbf{x}_t, \mathbf{y}_t)] \geq (1 - \beta) \mathbf{w}_t^\top \phi(\mathbf{x}_t, \hat{\mathbf{y}}_t)$$

we have that:

$$\mathbf{E}[\mathbf{w}_t^\top (\phi(\mathbf{x}_t, \bar{\mathbf{y}}_t) - \phi(\mathbf{x}_t, \mathbf{y}_t))] \leq \beta \mathbf{w}_t^\top \phi(\mathbf{x}_t, \hat{\mathbf{y}}_t)$$

From here on, the proof from (Raman et al., 2012) can be used, to prove the corresponding regret bound. Thus in other words, the perturbation can be thought of as a way to produce an  $(1 - \beta)$ -approximate solution to the argmax problem.

### A.4. Proof of Proposition 5

Consider the case when documents in positions  $i$  and  $i + 1$  (call them  $d_i$  and  $d_{i+1}$ ) are swapped<sup>2</sup>:

$$\begin{aligned} \mathbf{w}_t^\top (\gamma_i - \gamma_{i+1})(\phi(\mathbf{x}_t, d_i) - \phi(\mathbf{x}_t, d_{i+1})) \\ \leq \left(1 - \frac{\gamma_{i+1}}{\gamma_i}\right) \mathbf{w}_t^\top (\gamma_i \phi(\mathbf{x}_t, d_i) + \gamma_{i+1} \phi(\mathbf{x}_t, d_{i+1})) \end{aligned}$$

Note that this factor  $1 - \frac{\gamma_{i+1}}{\gamma_i}$  is largest for  $i = 1$ . Thus we can state for every swapped pair:

$$\begin{aligned} \mathbf{w}_t^\top (\gamma_i - \gamma_{i+1})(\phi(\mathbf{x}_t, d_i) - \phi(\mathbf{x}_t, d_{i+1})) \\ \leq \left(1 - \frac{\gamma_2}{\gamma_1}\right) \mathbf{w}_t^\top (\gamma_i \phi(\mathbf{x}_t, d_i) + \gamma_{i+1} \phi(\mathbf{x}_t, d_{i+1})) \end{aligned}$$

Summing this over all swapped pairs, and using the fact that each pair has some probability  $p$  to be swapped:

$$\begin{aligned} \mathbf{w}_t^\top (\phi(\mathbf{x}_t, \hat{\mathbf{y}}_t) - \mathbf{E}[\phi(\mathbf{x}_t, \mathbf{y}_t)]) \\ \leq p \left(1 - \frac{\gamma_2}{\gamma_1}\right) \mathbf{w}_t^\top \phi(\mathbf{x}_t, \hat{\mathbf{y}}_t) \end{aligned}$$

### A.5. Proof of Proposition 6

We prove a more general proposition here:

**Proposition 7** For  $\Delta \geq 0$ , dynamically setting the swap prob. of 3PR to be

$$p_t \leq \max \left( 0, \min \left( 1, c(\Delta \cdot t - R_t) \right) \right), \quad (11)$$

<sup>2</sup>This holds assuming the inner products with documents are non-negative. Thus algorithmically this can be implemented by only ranking documents with non-negative scores.

for some positive constant  $c$ , has regret

$$\leq \frac{1}{\alpha T} \sum_{t=1}^T \xi_t + \frac{\|\mathbf{w}_*\|}{\alpha \sqrt{T}} \sqrt{4R^2 + 2\Delta + (\gamma_1 - \gamma_2)R \sqrt{\frac{4R^2 + 2\Delta}{T}}}.$$

**Proof** We prove this by using Theorem 2. In particular, we show:

$$\frac{1}{T} \sum_{t=1}^T \mathbf{w}_t^\top (\phi(\mathbf{x}_t, \bar{\mathbf{y}}_t) - \phi(\mathbf{x}_t, \mathbf{y}_t)) < \Delta + \Gamma \sqrt{\frac{4R^2 + 2\Delta}{T}} \quad (12)$$

where  $\Gamma = (\gamma_1 - \gamma_2)R$ . We will show this holds by induction on  $T$ . Note that this condition trivially holds for  $T = 0$  (base case). Now assume it holds for  $T = k - 1$ . We will show it is true for  $T = k$ . Consider the cumulative affirmativeness  $R_k = \sum_{i=1}^{k-1} \mathbf{w}_i^\top \phi(\mathbf{x}_i, \bar{\mathbf{y}}_i) - \mathbf{w}_i^\top \phi(\mathbf{x}_i, \mathbf{y}_i)$ . There are 2 cases to consider:

- $R_k \geq k\Delta$ : If this is the case  $p_k = 0$  *i.e.*, no perturbation is performed for iteration  $k$  and hence  $\mathbf{y}_k = \hat{\mathbf{y}}_k = \arg\max_{\mathbf{y}} \mathbf{w}_k^\top \phi(\mathbf{x}_k, \mathbf{y})$ . Therefore  $\mathbf{w}_k^\top (\phi(\mathbf{x}_k, \bar{\mathbf{y}}_k) - \phi(\mathbf{x}_k, \mathbf{y}_k)) \leq 0$ ; thus  $R_{k+1} \leq R_k$  and hence the induction hypothesis is satisfied.
- $R_k < k\Delta$ : We have  $\|\mathbf{w}_k\| \leq \sqrt{k(4R^2 + 2\Delta)}$  as shown in the proof of Thm 2. As per the perturbation, for all  $\mathbf{y}_k$  we have  $\|\phi(\mathbf{x}_k, \hat{\mathbf{y}}_k) - \phi(\mathbf{x}_k, \mathbf{y}_k)\| \leq \Gamma^3$ . Next by Cauchy-Schwarz we get  $\mathbf{w}_k^\top (\phi(\mathbf{x}_k, \hat{\mathbf{y}}_k) - \phi(\mathbf{x}_k, \mathbf{y}_k)) \leq \|\mathbf{w}_k\| \Gamma$ . Thus  $R_{k+1} \leq R_k + \Gamma \sqrt{k(4R^2 + 2\Delta)}$ ; hence satisfying the induction hypothesis.

Thus the induction holds for  $T = k$ . Since equation (12) holds for all  $\mathbf{y}_t, \bar{\mathbf{y}}_t$ , this condition is also satisfied under expectation (over  $\mathbf{y}_t, \bar{\mathbf{y}}_t$ ). Hence the condition for Theorem 2 is satisfied, thus giving us the bound. Note that the second term on the RHS of Eq. (12) asymptotically disappears. ■

## B. Additional Details of User Study

The ranking function in the ArXiv search engine used 1000 features which can be categorized into the following three groups.

- Features the corresponded to rank as per query similarity with different components of the document (authors, abstract, article *etc.*). We used different similarity measures. For each of these document-components and similarity measures, we

had multiple features of the form  $\text{rank} \leq a$ , where  $a$  was a value we varied to create multiple features (we used 2, 5, 10, 15, 25, 30, 50, 100, 200).

- Second-order features the represented pairwise combinations of rank (for the default similarity measure) for 2 different document-components.
- Query-independent features representing the document age and the document category (e.g. AI, NLP, ML, Statistics *etc.*).

Our baseline, was a hand-coded solution using 35 features considered the most important by us.

<sup>3</sup>This assumes that the document feature vectors are component-wise non-negative. If this is not true, then the bound still holds but with  $\Gamma = 2R$
